# Supplementary material
Source: publisher figshare collection journal article supplement (https://acs.figshare.com/ndownloader/files/5964777)
Supplement: Supplementary file 1 [file 5964777]

## Supporting Information

# Self-Assembled Peptide Hydrogel as a Smart Biointerface for Enzyme-Based Electrochemical Biosensing and Cell Monitoring

*Meiling Lian,<sup>a</sup> Xu Chen,\* Yanluo Lu and Wensheng Yang\**

*State Key Laboratory of Chemical Resource Engineering, Beijing University of  
Chemical Technology, Beijing 100029, P. R. China*

\*Corresponding author. Tel.: +86 10 64435271; fax: +86 10 64425385.

*E-mail address:* chenxu@mail.buct.edu.cn. (X. Chen)

yangws@mail.buct.edu.cn. (W. Yang)

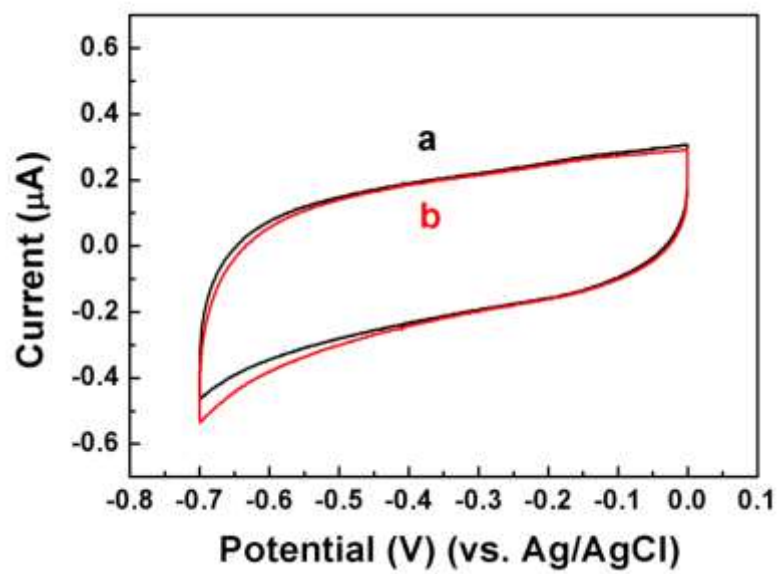

**Figure S1.** CVs of the Fmoc-FF hydrogel/GCE with (a) 0, (b) 30  $\mu\text{M}$   $\text{H}_2\text{O}_2$  in 0.1 M PBS (pH 7.0) at a scan rate of  $0.1 \text{ V s}^{-1}$ .

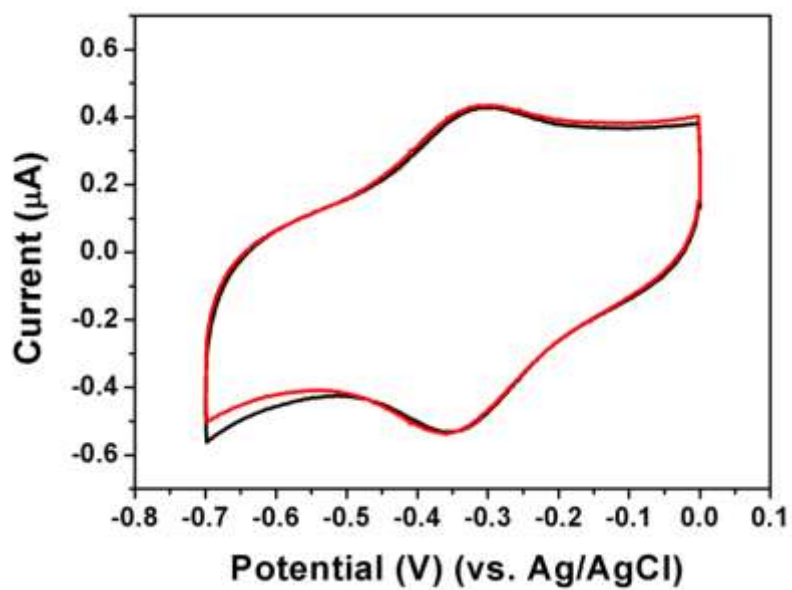

**Figure S2.** CVs obtained at the HRP/Fmoc-FF hydrogel/GCE in 0.1 M PBS (pH 7.0) before (black line) and after (red line) continuous scanned for 100 cycles. Scan rate:  $0.1 \text{ V s}^{-1}$ .

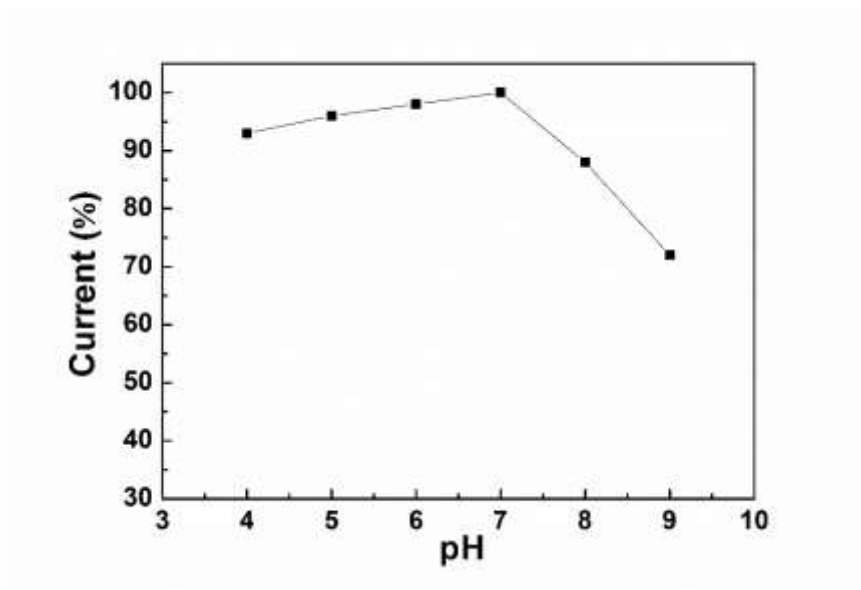

**Figure S3.** Effect of solution pH on the electrocatalytic responses of the HRP/Fmoc-FF hydrogel/GCE with 10  $\mu\text{M}$   $\text{H}_2\text{O}_2$  in 0.1 M PBS at  $-0.35$  V vs. Ag/AgCl.

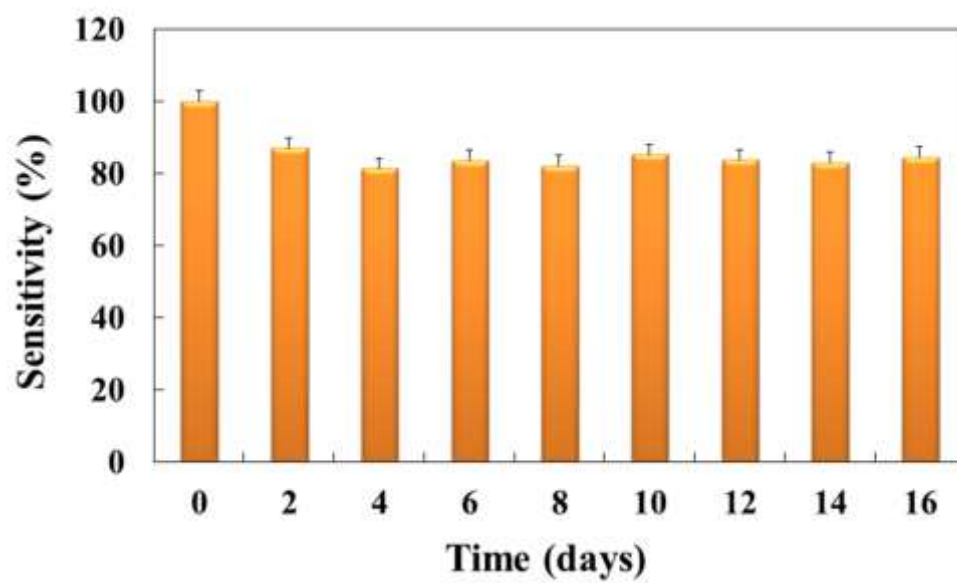

**Figure S4.** Stability test for the HRP/Fmoc-FF hydrogel/GCE at  $-0.35$  V vs. Ag/AgCl in 0.1 M PBS (pH 7.0) over 2 weeks.

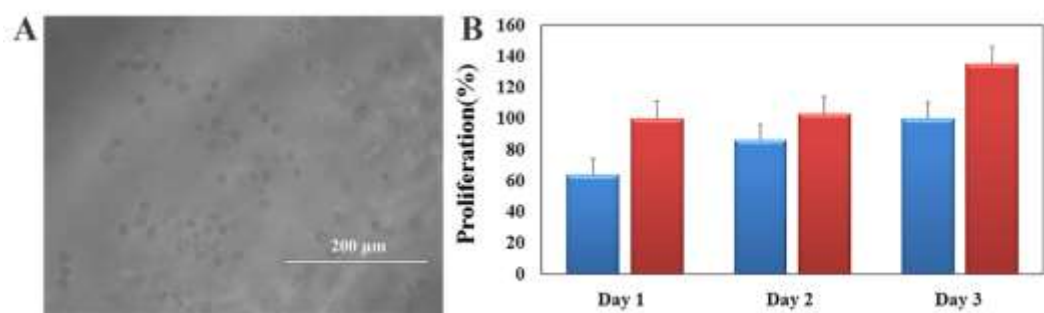

**Figure S5.** (A) HeLa cells cultured above the surface of the Fmoc-FF peptide hydrogel, scale bar represents 200  $\mu\text{m}$ . (B) Cell proliferation based on an MTT assay within the Fmoc-FF hydrogel (red), and the tissue culture plastic control (blue).

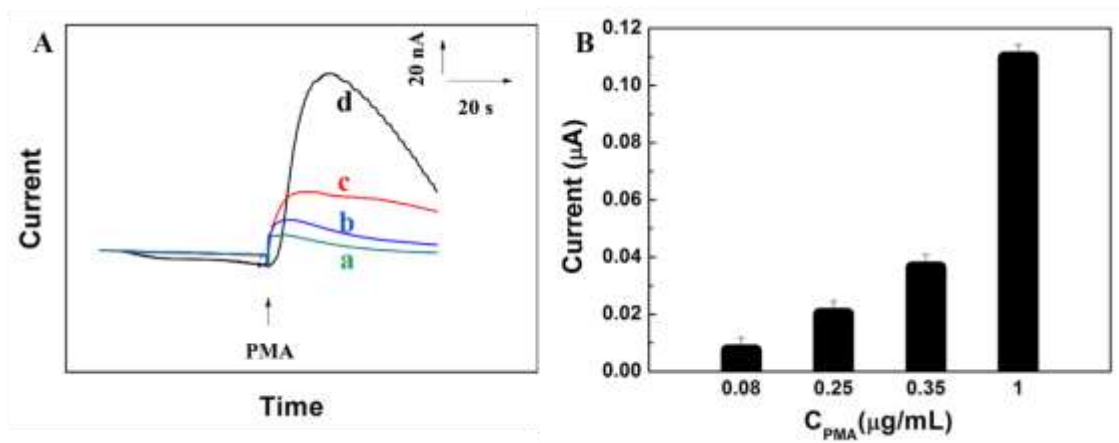

**Figure S6.** (A) Amperometric responses of the HRP/Fmoc-FF hydrogel/GCE with HeLa cells ( $3 \times 10^4$  cells) on the surface of the modified electrode induced by (a) 0.08, (b) 0.25, (c) 0.35 and (d)  $1 \mu\text{g mL}^{-1}$  PMA in 0.1 M PBS (pH 7.0) at  $-0.35 \text{ V}$  vs. Ag/AgCl. (B) The increase of the peak current obtained at the HRP/Fmoc-FF hydrogel/GCE with HeLa cells ( $3 \times 10^4$  cells) on the surface of the modified electrode induced by different concentration of PMA.

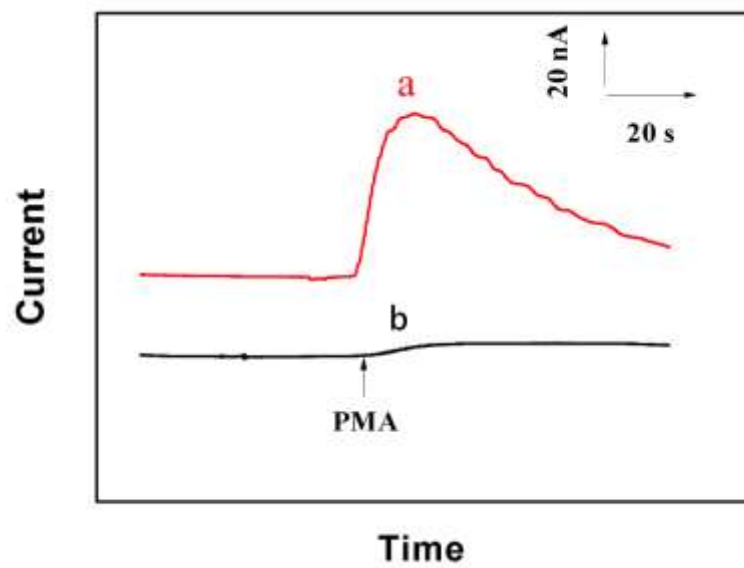

**Figure S7.** Amperometric responses of the HRP/Fmoc-FF hydrogel/GCE induced by PMA ( $1 \mu\text{g mL}^{-1}$ ) in 0.1 M PBS (pH 7.0) at  $-0.35 \text{ V}$  vs. Ag/AgCl, in the presence (a) and absence (b) of Hela cells ( $2 \times 10^6$  cells) in measured solutions.



**Table S1.** Comparison of the proposed H<sub>2</sub>O<sub>2</sub> biosensor with other HRP-based direct electrochemical biosensors.

| Different modified electrodes       | Linear range<br>( $\mu\text{M}$ ) | Detection limit<br>( $\mu\text{M}$ ) | Reference |
|-------------------------------------|-----------------------------------|--------------------------------------|-----------|
| HRP/Fmoc-FF hydrogel/GCE            | 0.1– 60.2                         | 0.018                                | this work |
| HRP-agarose/EPG                     | 4.2– 60.4                         |                                      | (1)       |
| HRP-PNM hydrogel/GCE                | 0.19–1.35                         | 0.0475                               | (2)       |
| HRP/chitosan/sol-gel/CNT/GCE        | 4.8–5000                          | 1.4                                  | (3)       |
| HRP-loaded PHC hydrogel/ITO         | 1–1000                            | 0.5                                  | (4)       |
| HRP/Ni-Al-LDHNS/GCE                 | 0.6–192                           | 0.4                                  | (5)       |
| HRP/TiO <sub>2</sub> -48/Nafion/GCE | 0.4–140                           | 0.05                                 | (6)       |
| HRP/Ag@C/ITO                        | 0.5–140                           | 0.2                                  | (7)       |
| HRP/C-Dots/LDHs/GCE                 | 0.1–23.1                          | 0.04                                 | (8)       |

PNM, poly (N-isopropylacylamide-co-3-methacryloxypropyltrimethoxy silane); CNT, carbon nanotubes; PHC, polyhydroxyl cellulose; LDHNS, layered double hydroxide nanosheets.

The number of extracellular H<sub>2</sub>O<sub>2</sub> molecule released per cell ( $N_0$ ) can be calculated according to:  $N_0 = \{[\Delta R \div (k \times A) \times V] \times N_A\} \div \{\varepsilon \times A\}$ , where  $\Delta R$  is current response,  $k$  is sensitivity of the sensing platform,  $A$  is electrode surface area,  $V$  is volume of electrolyte,  $N_A$  is the Avogadro constant ( $6.02 \times 10^{23}$ /mole), and  $\varepsilon$  is cell density.<sup>8</sup> With known current response of 109.7 nA (curve a of Figure 5B), a sensitivity of  $0.29 \mu\text{A } \mu\text{M}^{-1} \text{ cm}^{-2}$ , electrode surface area of  $7.07 \text{ mm}^2$ , and cell density of  $4243 \text{ mm}^{-2}$ , as well as the volume of the electrolyte (1 mL),  $N_0$  is calculated to be around  $10^{11}$ .

## References:

- (1) Liu, H. H., Tian, Z. Q., Lu, Z. X., Zhang, Z. L., Zhang, M., Pang, D. W. Direct Electrochemistry and Electrocatalysis of Heme-Proteins Entrapped in Agarose Hydrogel Films. *Biosens. Bioelectron.* **2004**, *20*, 294–304.
- (2) Sun, Y. X., Zhang, J. T., Huang, S. W., Wang, S. F. Hydrogen Peroxide Biosensor Based on the Bioelectrocatalysis of Horseradish Peroxidase Incorporated in A New Hydrogel Film. *Sens. Actuators B: Chem.* **2007**, *124*, 494–500.
- (3) Kang, X., Wang, J., Tang, Z., Wu, H., Lin, Y. Direct Electrochemistry and Electrocatalysis of Horseradish Peroxidase Immobilized in Hybrid Organic–Inorganic Film of Chitosan/Sol–Gel/Carbon Nanotubes. *Talanta* **2009**, *78*, 120–125.
- (4) Feng, L., Wang, L., Hu, Z., Tian, Y., Xian, Y., Jin, L. Encapsulation of Horseradish Peroxidase into Hydrogel, and Its Bioelectrochemistry. *Microchim.*

Acta **2009**, *164*, 49–54.

- (5) Chen, X., Fu, C., Wang, Y., Yang, W., Evans, D. G. Direct Electrochemistry and Electrocatalysis Based on A Film of Horseradish Peroxidase Intercalated into Ni–Al Layered Double Hydroxide Nanosheets. *Biosens. Bioelectron.* **2008**, *24*, 356–361.
- (6) Xie, Q., Zhao, Y., Chen, X., Liu, H., Evans, D. G., Yang, W. Nanosheet-Based Titania Microspheres with Hollow Core-Shell Structure Encapsulating Horseradish Peroxidase for A Mediator-Free Biosensor. *Biomaterials* **2011**, *32*, 6588–6594.
- (7) Mao, S., Long, Y., Li, W., Tu, Y., Deng, A. Core-shell Structured Ag@ C for Direct Electrochemistry and Hydrogen Peroxide Biosensor Applications. *Biosens. Bioelectron.* **2013**, *48*, 258–262.
- (8) Wang, Y., Wang, Z., Rui, Y., Li, M. Horseradish Peroxidase Immobilization on Carbon Nanodots/CoFe Layered Double Hydroxides: Direct Electrochemistry and Hydrogen Peroxide Sensing. *Biosens. Bioelectron.* **2015**, *64*, 57–62.
